# Supplementary material
Source: PubMed Central journal article supplement (PMC4596667)
Supplement: 10.1534_115.178293_genetics.115.178293-4.pdf [file 10.1534_115.178293_genetics.115.178293-4.pdf]

**Table S2 Spo11-oligo sequencing statistics**

| <b>Sample</b>        | <b>Total sequenced</b> | <b>Total mapped<sup>a</sup></b> | <b>Total filtered<sup>b</sup></b> | <b>Uniquely mapped<sup>c</sup></b> |
|----------------------|------------------------|---------------------------------|-----------------------------------|------------------------------------|
| wild type sample 1   | 4,361,438              | 4,302,910 (98.6%)               | 3,762,134 (86.2%)                 | 3,633,091 (83.3%)                  |
| wild type sample 2   | 2,783,885              | 2,700,065 (97.0%)               | 2,360,467 (84.8%)                 | 2,280,452 (81.9%)                  |
| <i>bas1</i> sample 1 | 5,615,623              | 5,545,624 (98.8%)               | 4,823,794 (85.9%)                 | 4,665,416 (83.1%)                  |
| <i>bas1</i> sample 2 | 5,219,925              | 3,906,560 (74.8%)               | 3,212,796 (61.5%)                 | 2,983,690 (57.2%)                  |
| <i>bas1</i> sample 3 | 5,410,693              | 5,349,120 (98.9%)               | 4,794,677 (88.6%)                 | 4,542,315 (84.0%)                  |
| <i>bas1</i> sample 4 | 5,401,936              | 5,211,575 (96.5%)               | 4,540,169 (84.0%)                 | 4,413,658 (81.7%)                  |
| <i>ino4</i> sample 1 | 3,241,998              | 3,203,647 (98.8%)               | 2,867,655 (88.4%)                 | 2,664,527 (82.2%)                  |
| <i>ino4</i> sample 2 | 3,631,197              | 3,614,320 (99.5%)               | 3,188,652 (87.8%)                 | 3,117,705 (85.9%)                  |
| <i>ino4</i> sample 3 | 4,160,807              | 4,127,194 (99.2%)               | 3,616,144 (86.9%)                 | 3,480,102 (83.6%)                  |

<sup>a</sup> The fraction of sequences that could not be mapped likely reflect sequencing errors, adaptor dimers, PCR dimers and *bona fide* Spo11-oligos derived from genomic regions that are unique to SK1 (i.e., not found in the S288C reference strain).

<sup>b</sup> Total number of reads that filtered to get rid of reads with poor alignment and/or adaptor clipping.

<sup>c</sup> Total number of reads that mapped to only one position in the genome.
