# Supplementary material
Source: PubMed Central journal article supplement (PMC4596667)
Supplement: 10.1534_115.178293_genetics.115.178293-5.pdf [file 10.1534_115.178293_genetics.115.178293-5.pdf]

**Table S1 Yeast strains**

| Strain number | Genotype                                                                                                                                                                                                                                                                                                              |
|---------------|-----------------------------------------------------------------------------------------------------------------------------------------------------------------------------------------------------------------------------------------------------------------------------------------------------------------------|
| SKY3821       | <i>MATa/MAT<math>\alpha</math>; ho::LYS2<sup>+</sup>; lys2<sup>-</sup>; ura3<sup>+</sup>; leu2<sup>-</sup>; arg4-Bgl<sup>I</sup>; nuc1<math>\Delta</math>::LEU2<sup>+</sup>; SPO11-His6-flag3-loxP-kanMX-loxP<sup>+</sup></i>                                                                                         |
| SKY3860       | <i>MATa/MAT<math>\alpha</math>; ho::LYS2<sup>+</sup>; lys2<sup>-</sup>; ura3<sup>+</sup>; leu2<sup>-</sup>; arg4-Bgl<sup>I</sup>; nuc1<math>\Delta</math>::LEU2<sup>+</sup>; SPO11-His6-flag3-loxP-kanMX-loxP<sup>+</sup>; bas1<math>\Delta</math>::hphMX<sup>+</sup>; sae2<math>\Delta</math>::NatMX<sup>+</sup></i> |
| SKY3880       | <i>MATa/MAT<math>\alpha</math>; ho::LYS2<sup>+</sup>; lys2<sup>-</sup>; ura3<sup>+</sup>; leu2<sup>-</sup>; arg4-Bgl<sup>I</sup>; nuc1<math>\Delta</math>::LEU2<sup>+</sup>; SPO11-His6-flag3-loxP-kanMX-loxP<sup>+</sup>; sae2<math>\Delta</math>::NatMX<sup>+</sup></i>                                             |
| SKY4019       | <i>MATa/MAT<math>\alpha</math>; ho::LYS2<sup>+</sup>; lys2<sup>-</sup>; ura3<sup>+</sup>; leu2<sup>-</sup>; arg4-Bgl<sup>I</sup>; nuc1<math>\Delta</math>::LEU2<sup>+</sup>; SPO11-His6-flag3-loxP-kanMX-loxP<sup>+</sup>; bas1<math>\Delta</math>::hphMX<sup>+</sup></i>                                             |
| SKY4603       | <i>MATa/MAT<math>\alpha</math>; ho::LYS2<sup>+</sup>; lys2<sup>-</sup>; ura3<sup>+</sup>; leu2<sup>-</sup>; arg4-Nspl<sup>I</sup>; nuc1<math>\Delta</math>::LEU2<sup>+</sup>; BAS1-myc13-KanMX<sup>+</sup></i>                                                                                                        |
| SKY4680       | <i>MATa/MAT<math>\alpha</math>; ho::LYS2<sup>+</sup>; lys2<sup>-</sup>; ura3<sup>+</sup>; leu2<sup>-</sup>; arg4-Bgl<sup>I</sup>; nuc1<math>\Delta</math>::LEU2<sup>+</sup>; SPO11-His6-flag3-loxP-kanMX-loxP<sup>+</sup>; ino4<math>\Delta</math>::hphMX<sup>+</sup></i>                                             |
| SKY4696       | <i>MATa/MAT<math>\alpha</math>; ho::LYS2<sup>+</sup>; lys2<sup>-</sup>; ura3<sup>+</sup>; leu2<sup>-</sup>; arg4<sup>I</sup>; nuc1<math>\Delta</math>::LEU2<sup>+</sup>; INO4-myc13-KanMX<sup>+</sup></i>                                                                                                             |
| SKY4846       | <i>MATa/MAT<math>\alpha</math>; ho::LYS2<sup>+</sup>; lys2<sup>-</sup>; ura3<sup>+</sup>; leu2<sup>-</sup>; arg4<sup>I</sup>; nuc1<math>\Delta</math>::LEU2<sup>+</sup>; SPO11-His6-flag3-loxP-kanMX-loxP<sup>+</sup>; ino4<math>\Delta</math>::hphMX<sup>+</sup>; sae2<math>\Delta</math>::NatMX<sup>+</sup></i>     |
